# Supplementary material for: Metformin regulates bone marrow stromal cells to accelerate bone healing in diabetic mice
Source: eLife. 2023 Jul 7;12:e88310. doi: 10.7554/eLife.88310 (PMC10356134; doi:10.7554/eLife.88310)
Supplement: Figure 1—figure supplement 1—source data 1. [file elife-88310-fig1-figsupp1-data1.xlsx]

## Sheet: Fig1-supple1
Supplementary Fig 1A
		WT PBS			WT Met			MKR PBS			MKR Met
		Mean	SD	N	Mean	SD	N	Mean	SD	N	Mean	SD	N
	1	162.833	15.3885	6	163.667	34.3786	6	492.667	77.2219	6	484.167	68.5892	6
	7	140.333	19.2758	6	158.333	24.0393	6	502	83.2606	6	414.833	72.4946	6
	14	163.167	22.7407	6	156.333	18.616	6	493.667	62.5584	6	311	106.729	6
Supplementary Fig 1B
		WT PBS			WT Met			MKR PBS			MKR Met
		Mean	SD	N	Mean	SD	N	Mean	SD	N	Mean	SD	N
	0	119.167	20.3995	6	99.6667	22.058	6	233.667	69.0185	6	178.833	27.8413	6
	15	385.667	113.384	6	361.167	86.9874	6	498.5	72.7753	6	481.167	92.6668	6
	30	478.5	72.0989	6	504.5	82.7219	6	586	20.2073	6	534.833	57.6062	6
	60	398.333	107.604	6	417.667	78.5805	6	520.5	62.468	6	476.333	36.7771	6
	120	160.167	36.9748	6	198	33.7738	6	366.333	74.721	6	261.833	50.0813	6
