# Supplementary material for: Metformin regulates bone marrow stromal cells to accelerate bone healing in diabetic mice
Source: eLife. 2023 Jul 7;12:e88310. doi: 10.7554/eLife.88310 (PMC10356134; doi:10.7554/eLife.88310)
Supplement: Figure 1—figure supplement 2—source data 1. [file elife-88310-fig1-figsupp2-data1.xlsx]

## Sheet: Fig1-supple2
Supplementary Fig 2A
	WT PBS					WT Met						MKR PBS					MKR Met
PPAR- γ	0.972108	0.813521	1.66397	0.996113	0.762889	0.730198	0.759724	0.726845	0.89447	1.05078	0.963761	1.36656	1.26519	1.40158	1.29902		0.596636	0.366745	0.19743	0.294043
C/EBP-α	1.08827	0.955657	1.14197	0.761994	1.10498	0.883918	0.94406	0.831027	0.9264	1.26304	1.10684	1.12173	0.89777	1.10035	1.32167	1.10781	0.896743	0.955587	0.729627	0.483326	0.496583
Supplementary Fig 2B
	WT PBS					WT Met						MKR PBS					MKR Met
RUNX2	0.604354	1.26662	1.11852	0.897117	1.30188	1.03009	0.480351	0.800864	1.49342	1.03117		0.774841	1.21935	1.33359	1.17553	1.25213	1.7169	1.22436	1.64371	0.77304	1.04374
SP7	0.655924	1.72885	0.914808	0.992737	0.97101	0.868158	1.41704	0.652476	0.656884	1.47386	0.820656	1.04286	1.4116	1.1305	1.82687	1.13435	1.17404	1.49204	1.99198	0.922331	1.5082
Supplementary Fig 2C
	WT PBS					WT Met						MKR PBS					MKR Met
SOX 9	0.401159	1.85063	0.420388	1.25298	2.55722	0.845789	1.58243	1.16394	1.55521	1.70944	0.555526	0.187928	0.286351	0.389254	0.960897	0.827587	3.16949	3.0503	1.28749	2.05696
Supplementary Fig 2D
	WT PBS					WT Met						MKR PBS						MKR Met
PPAR- γ	0.69799	0.713249	1.04272	1.6097	1.19674	0.478029	0.955126	0.986146	1.0894	1.21197	1.4295	0.97369	1.23049	1.5855	1.31966	1.62332	1.45253	0.95107	1.1164	0.107443	1.08902	1.1296	0.737242
C/EBP-α	0.962635	0.861299	1.11306	0.931486	1.16329	0.932554	1.29353	0.989955	0.925871	1.02968	0.970982	0.903541	0.819842	0.712548	0.740892	0.753711		0.595571	0.93994	0.590459	0.874879	0.886096	0.667245
Supplementary Fig 2E
	WT PBS					WT Met					MKR PBS					MKR Met
RUNX2	0.672492	0.909026	1.33755	1.03546	1.18112	1.07409	0.778091	1.28711	0.911414	1.43368	0.973073	0.686815	0.903876	1.0454		0.887072	0.904037	1.21593	0.805769
SP7	0.612106	1.1576	1.55433	1.15142	0.788563	0.800173	0.949296	1.7878	0.566801	0.88623	0.409946	0.614187	0.479303	0.710093	0.658592	0.583327	0.476638	0.713362	0.505266	0.496453	0.413186
Supplementary Fig 2F
	WT PBS					WT Met						MKR PBS						MKR Met
SOX 9	0.587661	1.05099	1.47104	1.00069	1.0999	0.626497	0.810396	0.625483	1.35742	0.925705	1.02456	0.478271	0.51097	0.491737	0.649627	0.560778	0.612126	0.463223	0.493197	0.663733	0.552178	0.940771	0.412055
Supplementary Fig 2G					Supplementary Fig 2H
WT	WT	MKR	MKR		WT	WT	MKR	MKR
PBS	Met	PBS	Met		PBS	Met	PBS	Met
0.933609	1.00186	1.82238	0.462874		0.671933	1.77803	0.575528	1.02222
1.61138	0.779278	0.491342	1.02173		1.37643	1.34038	0.55884	0.846839
0.681198	1.17813	1.12311	2.08985		1.94423	0.770229	0.437445	1.55191
1.18422	0.923478	1.6055	1.23785		0.630842	0.832588	0.434329	1.95423
0.824005	0.776542	0.540122	1.96598		0.881561		0.453056	0.709828
