# Supplementary material for: Metformin regulates bone marrow stromal cells to accelerate bone healing in diabetic mice
Source: eLife. 2023 Jul 7;12:e88310. doi: 10.7554/eLife.88310 (PMC10356134; doi:10.7554/eLife.88310)
Supplement: Figure 1—source data 1. [file elife-88310-fig1-data1.xlsx]

## Sheet: Fig 1
Fig 1 D
		14 days					23 days						31 days
WT	PBS	7.922	6.516	8.699	8.309		5.406	3.287	3.1	7.387			2.534	2.534	5.068	0.61
WT	Met	8.919	6.162	7.921	5.384		5.847	9.306	3.146				2.454	0.444	2.779	4.892
MKR	PBS	4.96418	6.76189	6.67479	5.6042		6.01829	8.12743	7.31038	7.64866	11.6379	8.1943	5.89296	4.42812	4.62497	4.21061	6.32323
MKR	Met	8.60118	9.78069	8.2375	6.86609	7.58049	6.3119	5.98006	7.00357	3.87922	4.8382		2.29964	2.31835	1.35577	2.00543	2.00808	1.26232
