# Supplementary material for: Metformin regulates bone marrow stromal cells to accelerate bone healing in diabetic mice
Source: eLife. 2023 Jul 7;12:e88310. doi: 10.7554/eLife.88310 (PMC10356134; doi:10.7554/eLife.88310)
Supplement: Figure 2—source data 1. [file elife-88310-fig2-data1.xlsx]

## Sheet: Fig 2
Fig 2C						Fig 2D
WT-PBS	WT-Met	MKR-PBS	MKR-Met			WT-PBS	WT-Met	MKR-PBS	MKR-Met
66.6667	33.3333	0	0			0.617	0.666	0.614	0.65
33.3333	33.3333	0	0			0.627	0.653	0.586	0.647
0	33.3333	0	0			0.64	0.669	0.578	0.642
33.3333	33.3333	0	33.3333			0.637	0.612	0.645	0.678
0	0	0	0			0.643	0.649	0.591	0.652
Fig 2E						Fig 2F
WT-PBS	WT-Met	MKR-PBS	MKR-Met			WT-PBS	WT-Met	MKR-PBS	MKR-Met
3.54337	3.81405	0.66664	1.06431			0.052145	0.05733	0.039902	0.053462
2.91424	1.81829	1.28019	0.66248			0.049428	0.055772	0.045954	0.050065
1.77688	3.46728	0.21083	1.19233			0.050819	0.057603	0.047491	0.047718
1.57825	1.35936	0.82999	2.67398			0.052477	0.046658	0.055483	0.05911
1.70422	2.34029	0.86742	0.97797			0.051516	0.054163	0.042066	0.053589
Fig 2H						Fig 2I
WT-PBS	WT-Met	MKR-PBS	MKR-Met			WT-PBS	WT-Met	MKR-PBS	MKR-Met
33.3333	100	33.3333	66.6667			0.661	0.666	0.590226	0.70656
100	66.6667	0	100			0.689	0.656	0.644972	0.681754
100	66.6667	33.3333	66.6667			0.792	0.67	0.66379	0.729656
100	100	0	100			0.7	0.758	0.585094	0.68432
66.6667	100	33.3333	66.6667			0.688	0.78	0.58766	0.678332
	33.3333						0.702
Fig 2J						Fig 2K
WT-PBS	WT-Met	MKR-PBS	MKR-Met			WT-PBS	WT-Met	MKR-PBS	MKR-Met
2.87618	5.15633	3.41156	5.49307			0.051366	0.061693	0.058454	0.097964
4.18375	3.55045	2.37588	4.6265			0.065877	0.058711	0.065524	0.07862
8.26086	3.65871	3.64293	7.80961			0.092402	0.059359	0.073698	0.089393
4.42588	4.99427	3.93066	5.83135			0.059725	0.073865	0.056165	0.075361
2.65923	5.07054	3.70288	8.75364			0.060359	0.085824	0.062633	0.077897
	7.14633						0.063341
