# Supplementary material for: Metformin regulates bone marrow stromal cells to accelerate bone healing in diabetic mice
Source: eLife. 2023 Jul 7;12:e88310. doi: 10.7554/eLife.88310 (PMC10356134; doi:10.7554/eLife.88310)
Supplement: Figure 3—source data 1. [file elife-88310-fig3-data1.xlsx]

## Sheet: Fig 3
Fig 3E						Fig 3F						Fig 3G						Fig 3H
WT-PBS	WT-Met	MKR-PBS	MKR-Met			WT-PBS	WT-Met	MKR-PBS	MKR-Met			WT-PBS	WT-Met	MKR-PBS	MKR-Met			WT-PBS	WT-Met	MKR-PBS	MKR-Met
0.704	0.693	0.634	0.672			70.82	76.2697	55.3574	74.3047			29.18	23.7303	44.6426	25.6953			0.022042	0.025919	0.045513	0.016371
0.739	0.807	0.553	0.724			71.4375	87.6973	49.6727	71.1546			28.5625	12.3027	50.3273	28.8454			0.027857	0.018978	0.044468	0.01316
0.704	0.719	0.635	0.667			80.1013	70.4459	53.8466	80.8608			19.8987	37.5945	46.1534	19.1392			0.014304	0.020119	0.049595	0.021219
0.753	0.739	0.683	0.679			76.8941	81.3064	56.593	75.1665			23.1059	18.6935	28.3322	24.8335			0.026412	0.019931	0.051254	0.012693
0.737	0.749	0.687	0.729			81.2289	77.6655	71.6677	80.6928			18.7711	22.3345	24.4808	19.3072			0.015671	0.007662	0.02772	0.014738
0.759	0.87	0.64	0.736			86.2668	87.7204	68.0811	76.8631			13.7332	12.2796	31.9189	23.1369			0.016022	0.003938	0.051372	0.04335
		0.692	0.76					58.8917	76.7802					41.1083	23.2198					0.046107	0.004345
		0.678	0.685					64.6363	61.058					35.3636	38.942					0.056134	0.022809
			0.75						73.5433						26.4567						0.022892
