# Supplementary material for: Metformin regulates bone marrow stromal cells to accelerate bone healing in diabetic mice
Source: eLife. 2023 Jul 7;12:e88310. doi: 10.7554/eLife.88310 (PMC10356134; doi:10.7554/eLife.88310)
Supplement: Figure 4—source data 1. [file elife-88310-fig4-data1.xlsx]

## Sheet: Fig 4
Fig 4B
		14 days								23 days								31 days
WT	PBS	37.896	27.2	21.048	30.352	31.024				15.264	14.816	16.296	26.256	21.936				22.808	19.648	17.896	19.632	25.48
WT	metformin	29.736	26.568	29.48	31.792	23.768				16.4	19.92	18.624	33.128	19.472				16.992	17.856	19.768	22.872	17.848
MKR	PBS	12.952	11.504	17	13.968	14.72	15.888	15.672		30.192	39.944	33.408	34.088	26.144	21.64	19.296	19.872	20.072	19.12	26.88	21.976	19.632	21.576	19.312
MKR	metformin	19.256	13.96	25.216	21.68	16.288	21.6	21.608	22.552	45.56	48.208	35.888	48.488	31.568	45.688	26.232		34.264	29.024	22.528	22.592	27.016	25.64	22.536	24.64
