# Supplementary material for: Metformin regulates bone marrow stromal cells to accelerate bone healing in diabetic mice
Source: eLife. 2023 Jul 7;12:e88310. doi: 10.7554/eLife.88310 (PMC10356134; doi:10.7554/eLife.88310)
Supplement: Figure 5—source data 1. [file elife-88310-fig5-data1.xlsx]

## Sheet: Fig 5
Fig 5B
WT_PBS				WT_Met
Initial seeding cell #	100	500	1000		100	500	1000
well 1	20	31	59	well 1	20	41	62
well 2	14	43	52	well 2	23	36	57
well 3	21	33	61	well 3	22	35	56
MKR_PBS				MKR_Met
Initial seeding cell #	100	500	1000		100	500	1000
well 1	5	21	38	well 1	12	34	44
well 2	6	23	31	well 2	11	34	49
well 3	0	12	24	well 3	14	31	56
Fig 5D					Fig 5F
WT	WT	MKR	MKR		WT	WT	MKR	MKR
PBS	Met	PBS	Met		PBS	Met	PBS	Met
47.137	50.514	4.339	36.45		37.3683	36.0854	0.577617	15.7586
54.55	55.162	8.153	31.768		23.442	43.1036	1.15524	17.5788
46.867	52.634	8.931	45.957		43.1814	44.9543	0.722022	18.8253
Fig 5I
PBS	Met
9.90479	37.7423
6.36117	34.564
7.30872	37.4272
9.05199	29.6162
