# Supplementary material for: Metformin regulates bone marrow stromal cells to accelerate bone healing in diabetic mice
Source: eLife. 2023 Jul 7;12:e88310. doi: 10.7554/eLife.88310 (PMC10356134; doi:10.7554/eLife.88310)
Supplement: Figure 6—source data 1. [file elife-88310-fig6-data1.xlsx]

## Sheet: Fig 6
Fig 6B
		14 days					23 days						31 days
WT	PBS	1.23607		0.303825	0.953356	1.00341	0.267344	0	0	0			0	0	0	0
WT	Met	0.808656		0.448431	0.675663	0.470325	0.0898375	0	0	0			0	0	0	0
MKR	PBS	0.350574	0.417558	0.479252	0.466437	0	0.009747	0.027776	0.75755	0.026911	0.060282	0	0	0	0	0	0
MKR	Met	0.771175	1.0744	0.76367	0.711344	0.557618	0.727944	0.084202	0.820799	0.73592	0.062613	0.398668	0	0	0	0	0	0
