# Supplementary material for: Metformin regulates bone marrow stromal cells to accelerate bone healing in diabetic mice
Source: eLife journal article supplement (doi:10.7554/elife.88310), 2023-07-07
Supplement: supp [file elife-88310-supp-v1.zip]

Figure 1- Figure Supplement 2

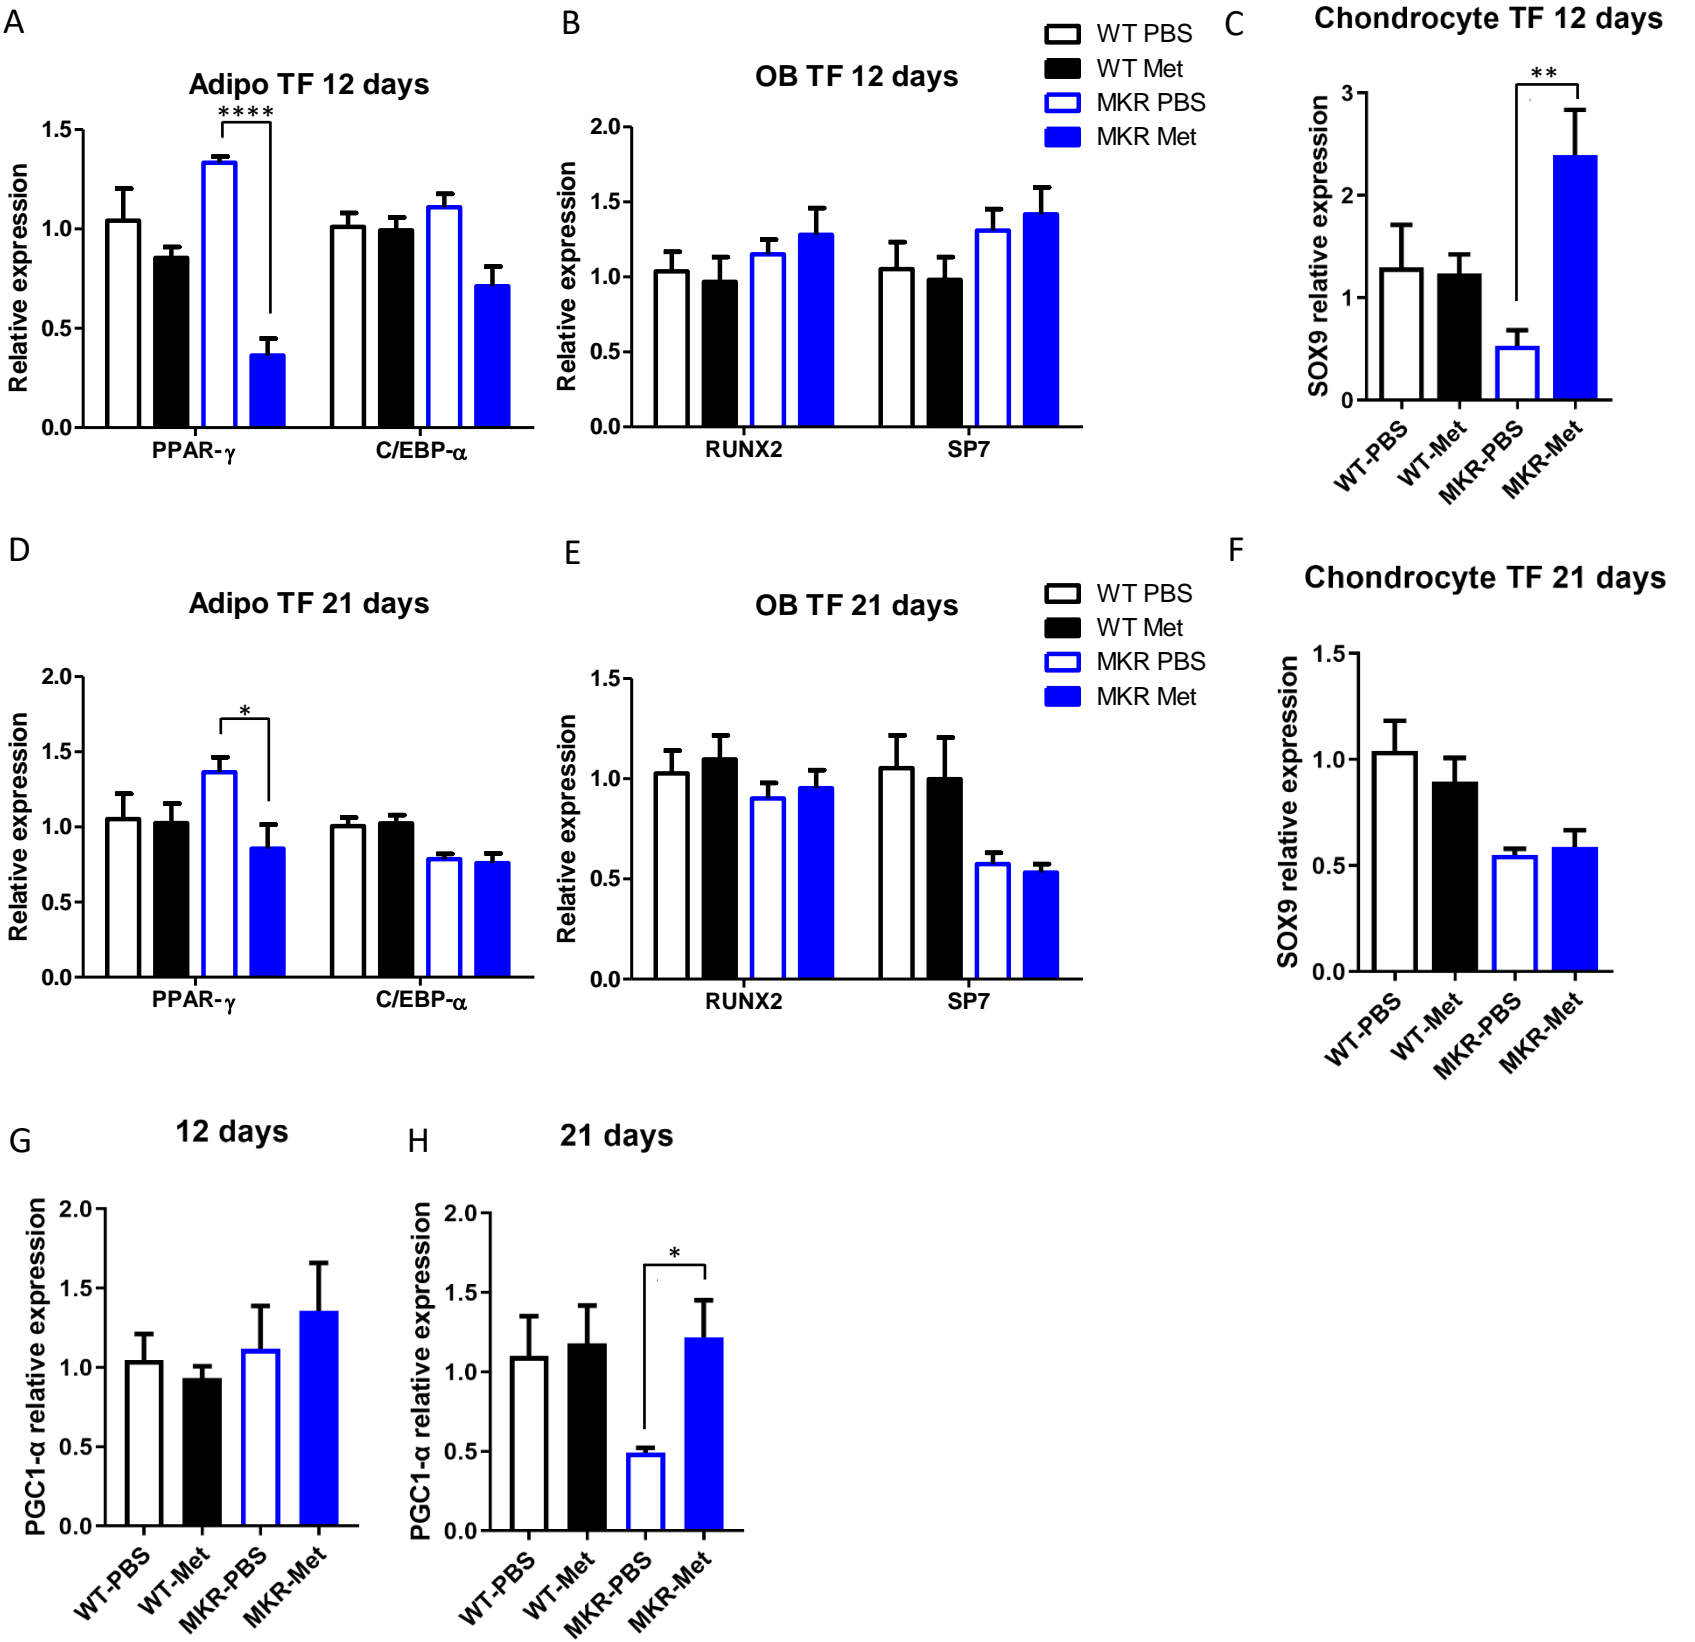

Figure 1- Figure Supplement 2. Transcript factor expressions within the femoral fracture callus tissue. A) adipocyte, B) osteoblast differentiation, and C) chondrogenesis transcript factors expression in the callus tissue at 12 days post-fracture. D) adipocyte, E) osteoblast differentiation, and F) chondrogenesis transcript factors expression in the callus tissue at 21 days post-fracture. PGC1 $\alpha$  expression in the callus tissue at G) 12 days H) 21 days post-fracture.
