# Supplementary material for: Metformin regulates bone marrow stromal cells to accelerate bone healing in diabetic mice
Source: eLife journal article supplement (doi:10.7554/elife.88310), 2023-07-07
Supplement: supp [file elife-88310-supp-v1.zip]

Figure 1- Figure Supplement 1

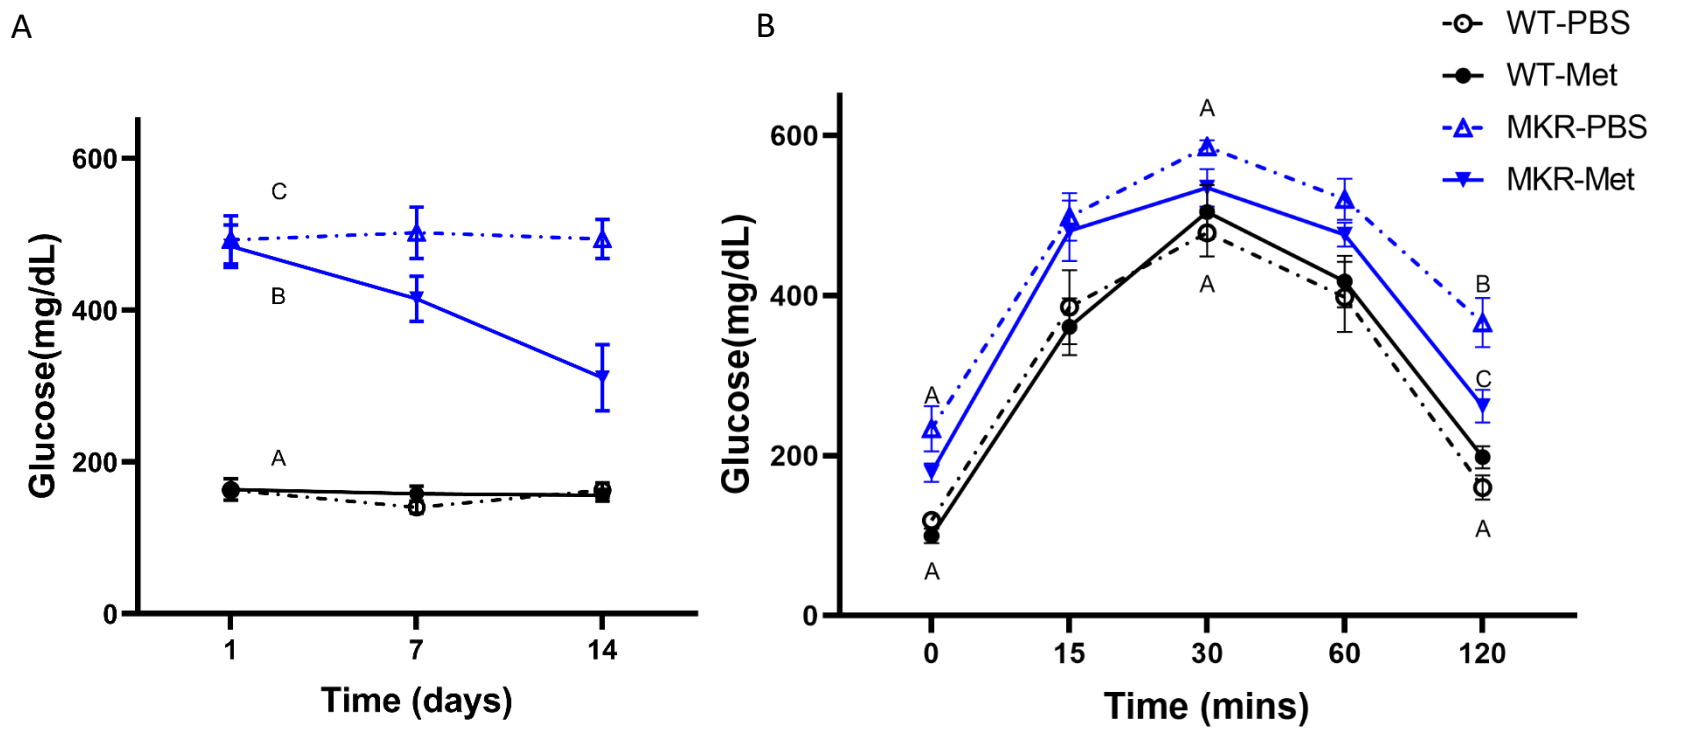

Figure 1- Figure Supplement 1. Metformin's effect on glucose levels in MKR mice. A) Glucose levels in WT and MKR mice throughout the 14 days PBS or metformin treatment. B) Glucose tolerance test (GTT) after fasting post 14 days PBS or metformin treatment. (N=6, SD) If different letters are shown at a time point, they are statistically different from one another (ANOVA,  $p < 0.05$  by post-hoc Tukey's).
